# Supplementary material for: Transcriptomic and metabolomic analysis of copper stress acclimation in Ectocarpus siliculosus highlights signaling and tolerance mechanisms in brown algae
Source: PubMed Central journal article supplement (PMC4108028; doi:10.1186/1471-2229-14-116), 2014-05-01
Supplement: 1471-2229-14-116-S2.pdf [file 1471-2229-14-116-S2.pdf]

**A**

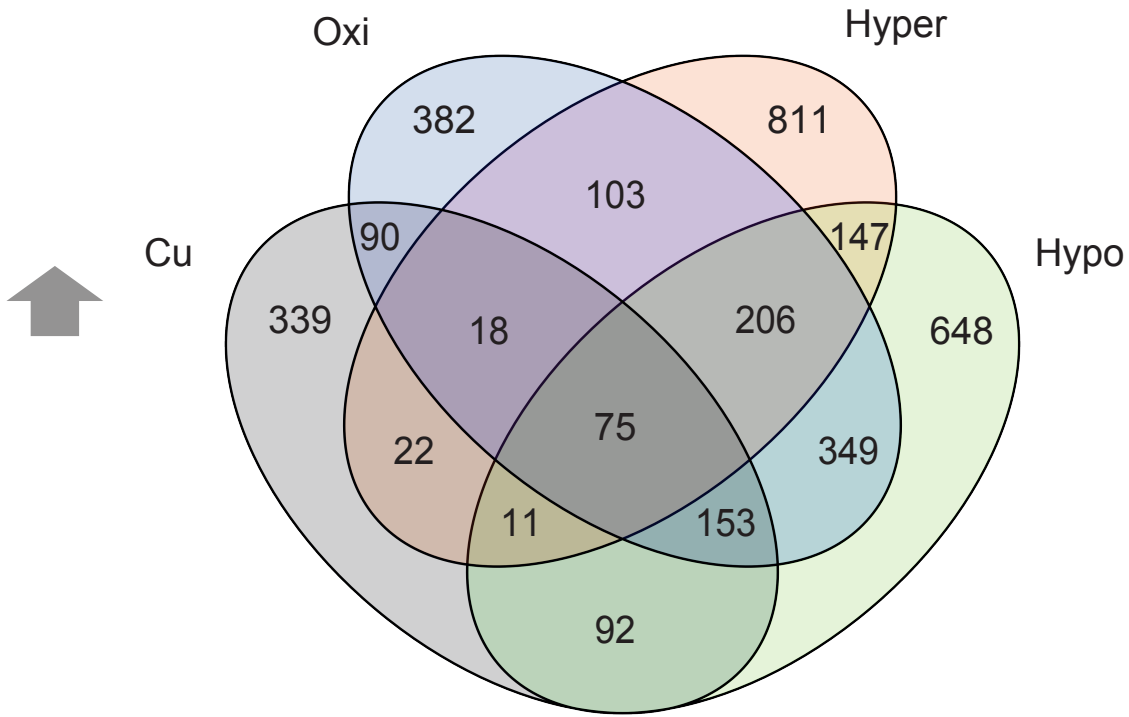

**B**

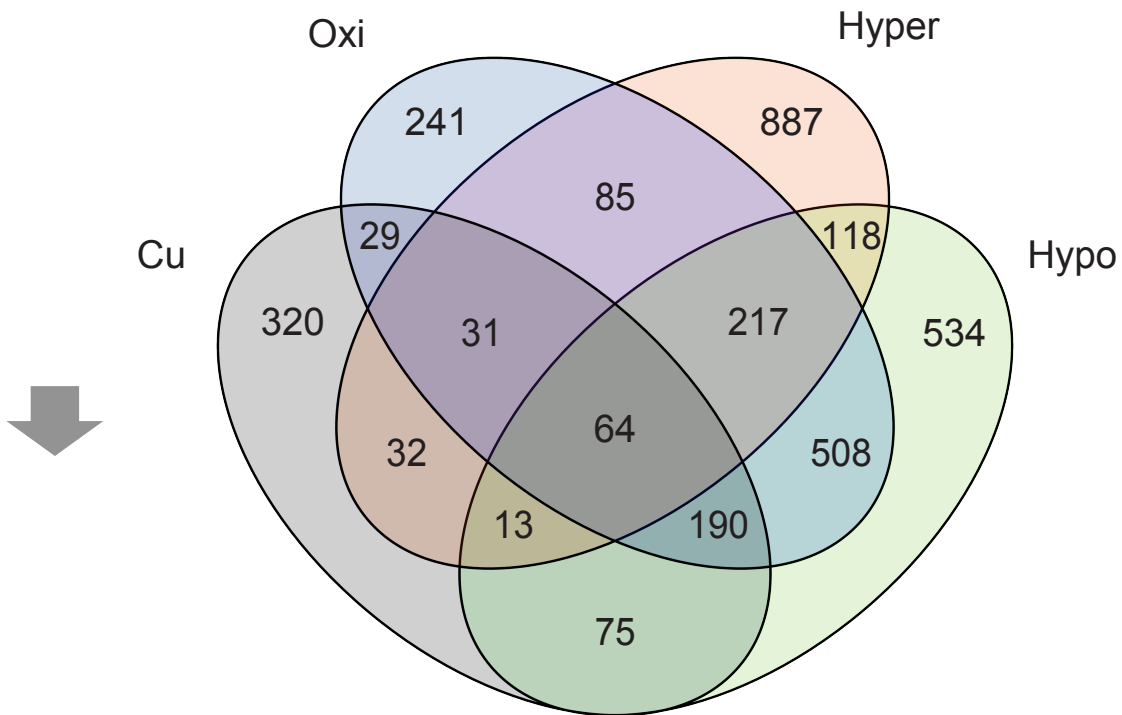

**Additional file 2.** Venn diagram representing the number of up-regulated (a) and down-regulated (b) contigs/singletons under copper (Cu), oxidative (Oxi), hypersaline (Hyper), and hyposaline (Hypo) stress conditions ( $p < 0.05$ ).
