# Supplementary material for: Transcriptomic and metabolomic analysis of copper stress acclimation in Ectocarpus siliculosus highlights signaling and tolerance mechanisms in brown algae
Source: PubMed Central journal article supplement (PMC4108028; doi:10.1186/1471-2229-14-116), 2014-05-01
Supplement: 1471-2229-14-116-S5.pdf [file 1471-2229-14-116-S5.pdf]

## Additional file 5

**A**

| Enzyme subfamily | Genbank Id | Protein region | Clustal W of the IHCD motif                                 |
|------------------|------------|----------------|-------------------------------------------------------------|
| Esi0060_0078     | CBN7495    | 226            | FMFTTNFQ <b>S</b> AGALA                                     |
| ZmAOS (CYP74A)   | AAR33048   | 272            | LLF <b>F</b> AT <b>T</b> FNSYGG <b>L</b> K                  |
| LeAOS (CYP74A)   | AAF67141   | 308            | FV <b>F</b> LAG <b>F</b> NSYGG <b>L</b> K                   |
| OsAOS (CYP74A)   | AAF50956   | 308            | IL <b>F</b> AL <b>C</b> FNSYGG <b>F</b> K                   |
| LuAOS (CYP74A)   | AAA03353   | 332            | IL <b>F</b> AV <b>C</b> FNSWGG <b>F</b> K                   |
| MtAOS (CYP74A)   | CAC86897   | 320            | LL <b>F</b> AT <b>C</b> FNS <b>F</b> GG <b>M</b> K          |
| PaAOS (CYP74A)   | CAA55025   | 269            | IL <b>F</b> AV <b>C</b> FNT <b>F</b> GG <b>F</b> K          |
| PgHPL (CYP74B)   | AAK15070   | 298            | LL <b>F</b> IL <b>G</b> FNA <b>F</b> GG <b>F</b> S          |
| LeHPL (CYP74B)   | AAF67142   | 280            | LL <b>F</b> IL <b>G</b> FNA <b>F</b> GG <b>F</b> S          |
| OsHPL (CYP74C)   | EAZ22254   | 281            | L <b>V</b> F <b>V</b> AI <b>F</b> NA <b>F</b> GG <b>F</b> K |
| MtHPL (CYP74C)   | CAC86899   | 282            | I <b>I</b> F <b>T</b> AG <b>F</b> NA <b>F</b> GG <b>L</b> K |
| NtDES (CYP74D)   | AAL40900   | 276            | ML <b>F</b> LV <b>G</b> IN <b>M</b> FAG <b>L</b> N          |
| CaDES (CYP74D)   | ABH03632   | 275            | ML <b>F</b> LV <b>G</b> IN <b>M</b> FAG <b>L</b> N          |

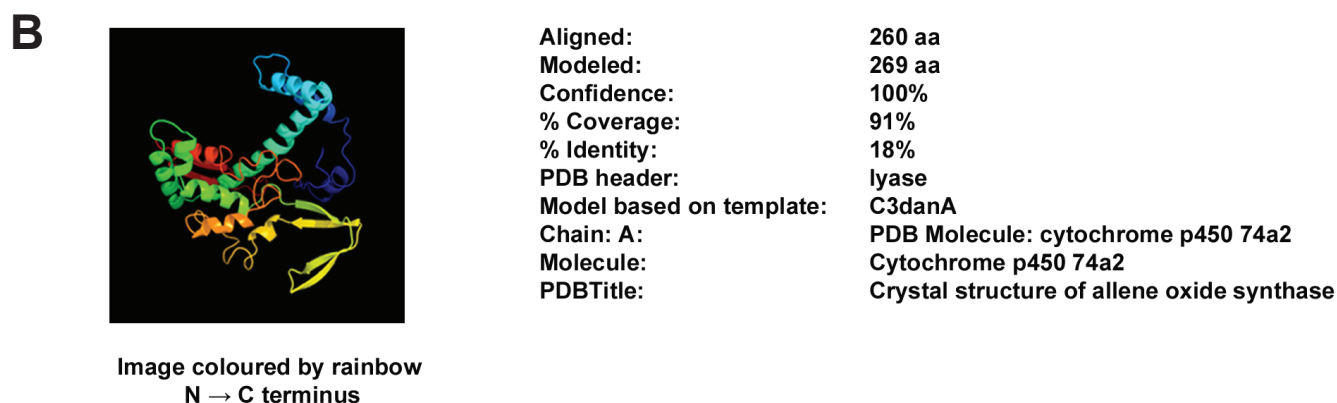

**Additional file 5.** (A) ClustalW multiple alignment of the CYP74 family IHCD domains from Esi0060\_0078 and homologs. The conserved catalytic residues FXXXXXSXX were highlighted in red for the CYP74A conserved phenylalanine residues and blue for the AOS specific serine residue. (B) Ribbon diagram of a predicted structural model of Esi0060\_0078 prepared with the Phyre2 software [73].
