# Supplementary material for: Transcriptomic and metabolomic analysis of copper stress acclimation in Ectocarpus siliculosus highlights signaling and tolerance mechanisms in brown algae
Source: PubMed Central journal article supplement (PMC4108028; doi:10.1186/1471-2229-14-116), 2014-05-01
Supplement: 1471-2229-14-116-S6.pdf [file 1471-2229-14-116-S6.pdf]

## Additional file 6

Esi0023\_0054

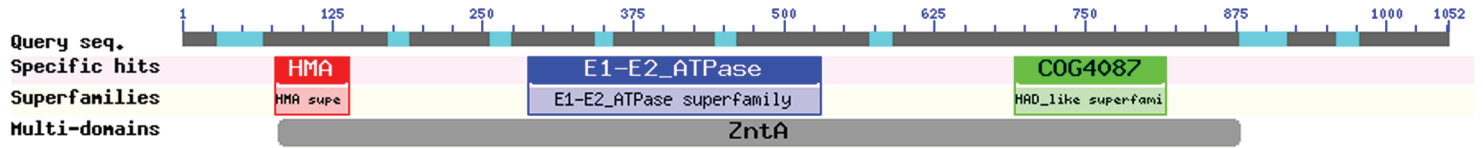

**Additional file 6.** Summary of features observed in the putative *E. siliculosus* Cu induced heavy metal P1B-ATPase (Esi0023\_0054). This sequence contains conserved heavy metal-associated (HMA), E1-E2 ATPase superfamily and haloacid dehalogenase (HAD) domains. The diagram was obtained by amino acid sequence analysis based on the Conserved Domains and Protein Classification Database.
