# Supplementary material for: Transcriptomic and metabolomic analysis of copper stress acclimation in Ectocarpus siliculosus highlights signaling and tolerance mechanisms in brown algae
Source: PubMed Central journal article supplement (PMC4108028; doi:10.1186/1471-2229-14-116), 2014-05-01
Supplement: 1471-2229-14-116-S7.pdf [file 1471-2229-14-116-S7.pdf]

## Additional file 7

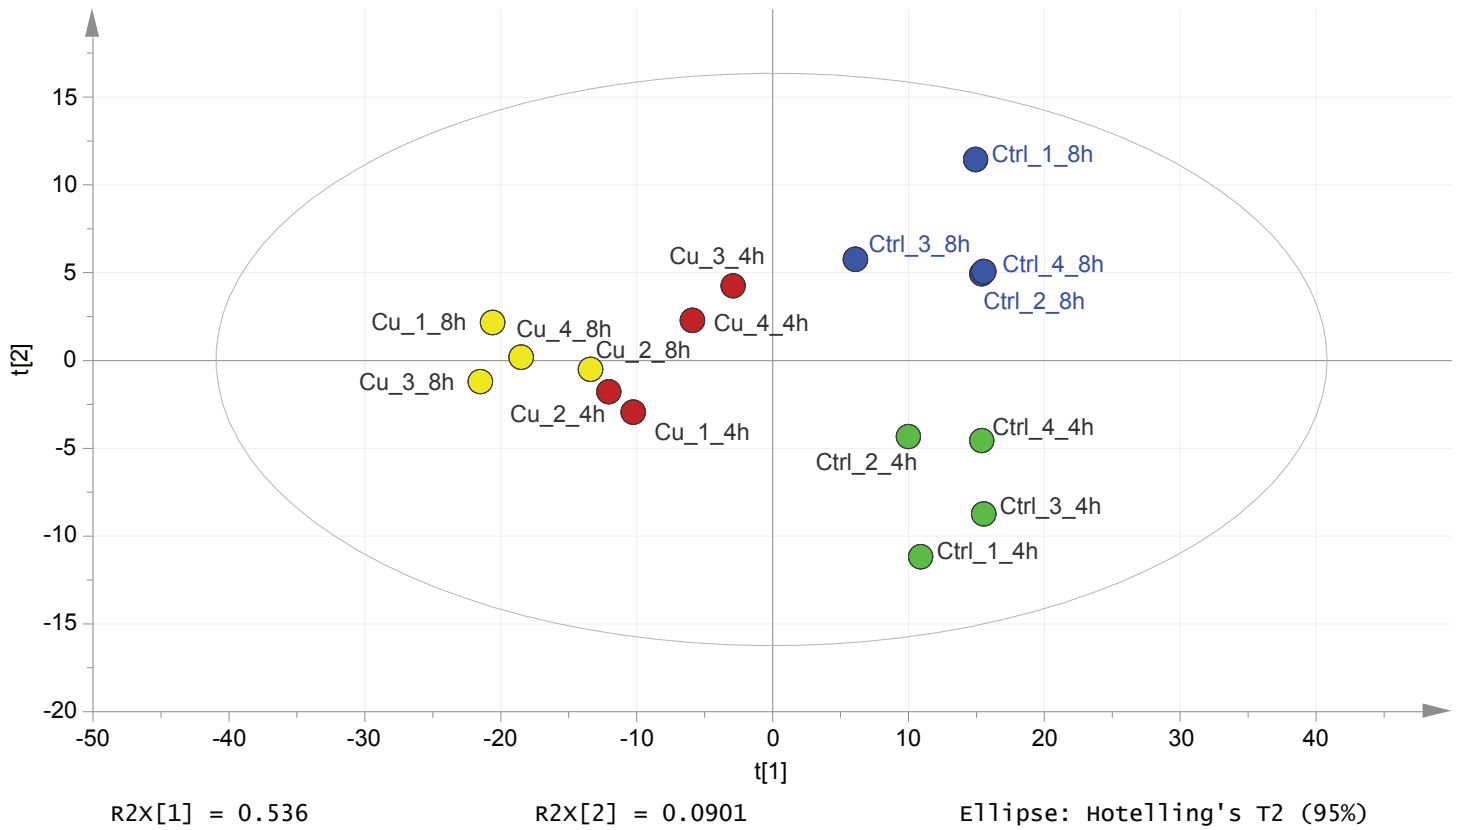

**Additional file 7.** Results of partial least squares discriminant analysis (PLS-DA) carried out for the compounds detected in the Cu-stress experiment. The plot represents the variations of 392 monoisotopic peaks quantified by UPLC-MS in positive ion mode in algal samples harvested after 4 h and 8 h of Cu-stress (red and yellow spots, respectively), as well as the corresponding controls (green and blue spots).
