# Supplementary material for: Transcriptomic and metabolomic analysis of copper stress acclimation in Ectocarpus siliculosus highlights signaling and tolerance mechanisms in brown algae
Source: PubMed Central journal article supplement (PMC4108028; doi:10.1186/1471-2229-14-116), 2014-05-01
Supplement: 1471-2229-14-116-S9.pdf [file 1471-2229-14-116-S9.pdf]

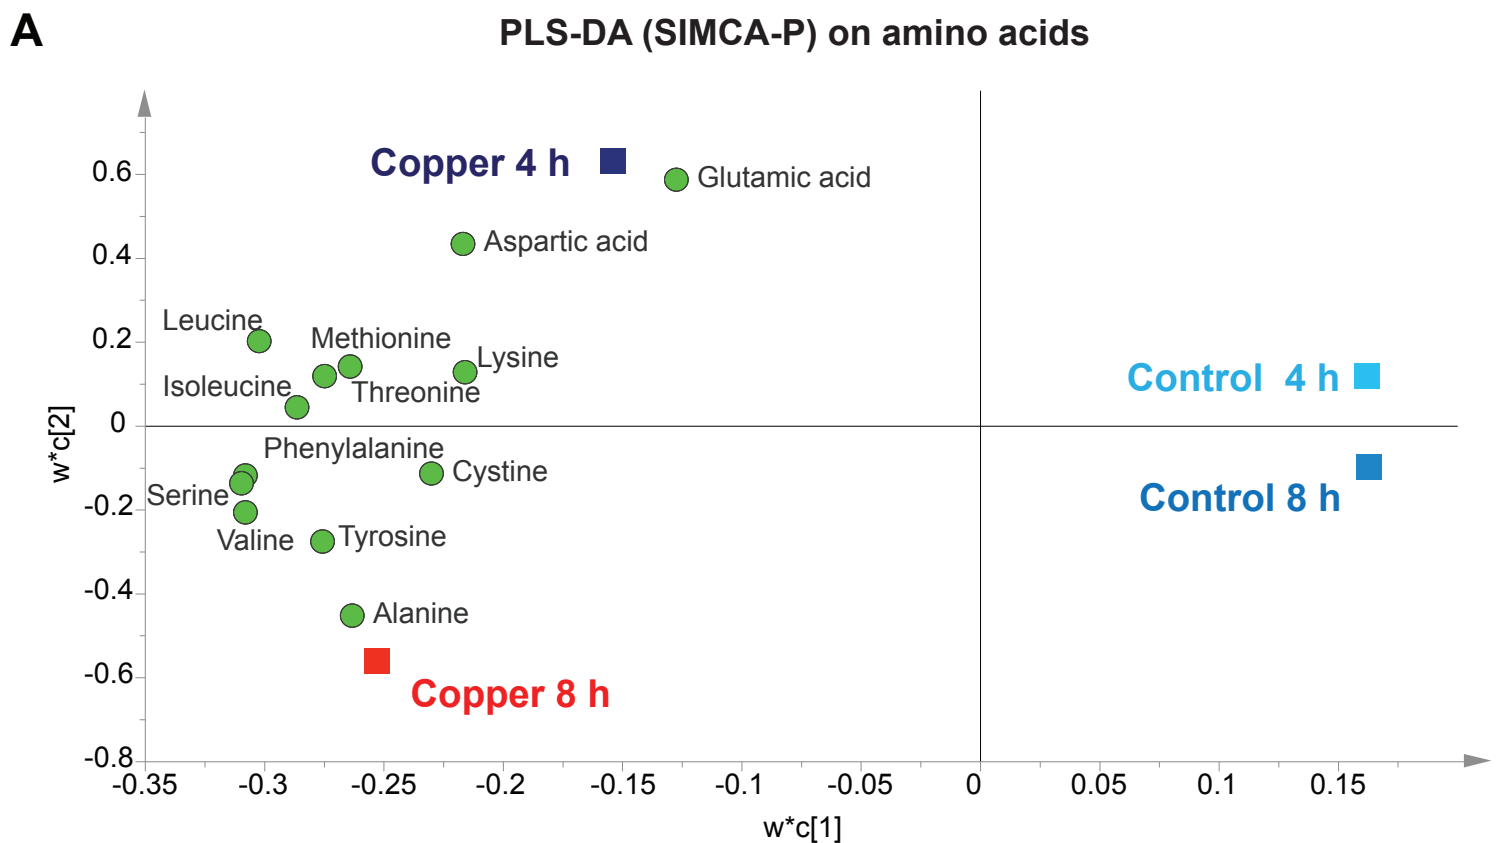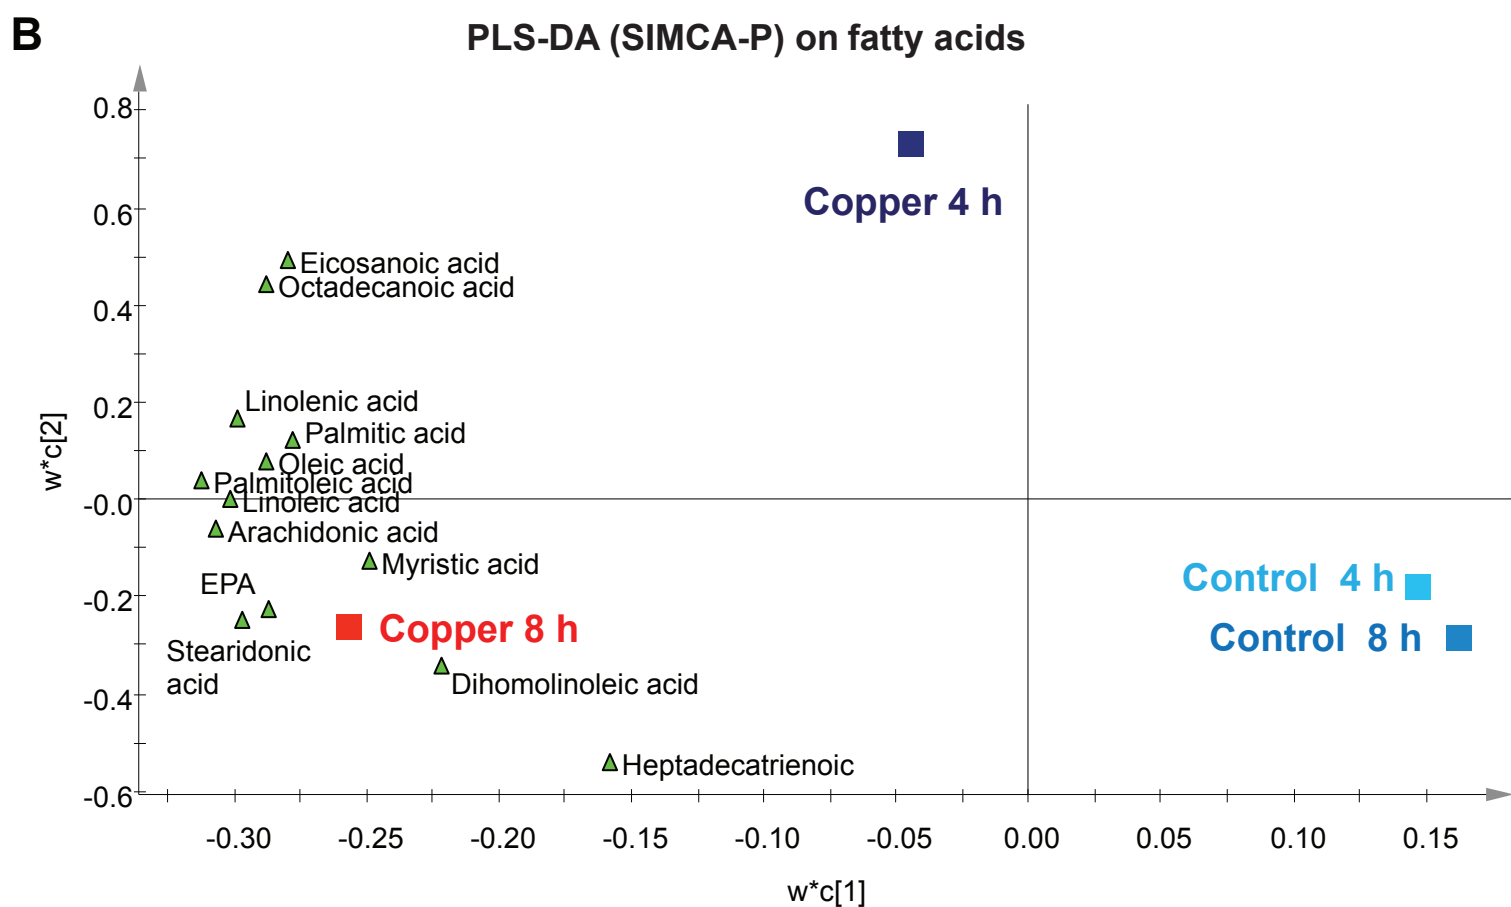

**Additional file 9.** Results of PLS-DA representing the variations of (A) amino acid (GC-MS analysis) and (B) fatty acid contents (UPLC-MS analysis) between control and Cu treated samples.
