# Supplementary material for: Transcriptomic and metabolomic analysis of copper stress acclimation in Ectocarpus siliculosus highlights signaling and tolerance mechanisms in brown algae
Source: PubMed Central journal article supplement (PMC4108028; doi:10.1186/1471-2229-14-116), 2014-05-01
Supplement: 1471-2229-14-116-S11.pdf [file 1471-2229-14-116-S11.pdf]

## Additoinal file 11: Detailed parameters used for XCMS analysis

---

### Software:

XCMSOnline version: ..... 0.0.84  
XCMS version: ..... 1.30.3

### 1. General parameters

Polarity: ..... positive  
retention time format: ..... minutes

### 2. Feature detection

method: ..... centWave  
ppm: ..... 5  
snthr: ..... 6  
peakwidth: ..... 5 60  
mzdiff: ..... 0.01  
prefilter peaks: ..... 3  
prefilter intensity: ..... 100  
noise: ..... 0

### 3. Retention time correction

method: ..... obiwarp  
profStep: ..... 0.1

### 4. Alignment

method: ..... density  
bw: ..... 20  
mzwid: ..... 0.015  
minfrac: ..... 0.7  
minsamp: ..... 1

### 5. FillPeaks

### 6. Diffreport

statistics.threshold.pvalue: ..... 0.05  
statistics.diffReport.value: ..... into

### 7. Additional Plots & Statistics

### 8. Annotation (isotopes & adducts)

featureAnnotation.CAMERA.annotate: ..... isotopes  
featureAnnotation.CAMERA.mzabs: ..... 0.015  
featureAnnotation.CAMERA.ppm: ..... 5  
featureAnnotation.CAMERA.sigma: ..... 6  
featureAnnotation.CAMERA.perfwhm: ..... 0.6  
featureAnnotation.CAMERA.maxcharge: ..... 3  
featureAnnotation.CAMERA.maxiso ..... 4  
featureAnnotation.CAMERA.intensity ..... into

### 9. Putative ID's (METLIN)

identification.METLIN.ppm: ..... 5  
identification.METLIN.adducts: ..... " M+H, M+Na "
